# Supplementary material for: Feasibility of robust estimates of ozone production rates using a synergy of satellite observations, ground-based remote sensing, and models
Source: Copernicus journal article supplement (doi:10.5194/acp-25-2061-2025), 2025-02-18
Supplement: Supplementary file 1 [file acp-25-2061-2025-supplement.pdf]

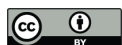

*Supplement of*

## **Feasibility of robust estimates of ozone production rates using a synergy of satellite observations, ground-based remote sensing, and models**

**Amir H. Souri et al.**

*Correspondence to:* Amir H. Souri (a.souri@nasa.gov)

The copyright of individual parts of the supplement might differ from the article licence.

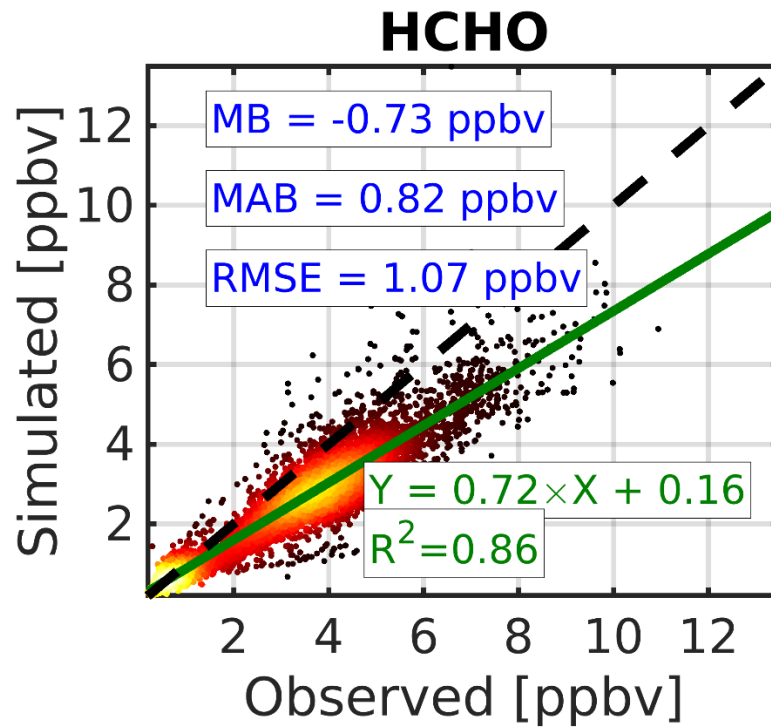

**Figure S1.** F0AM HCHO validation against observations during SENEX aircraft campaign.

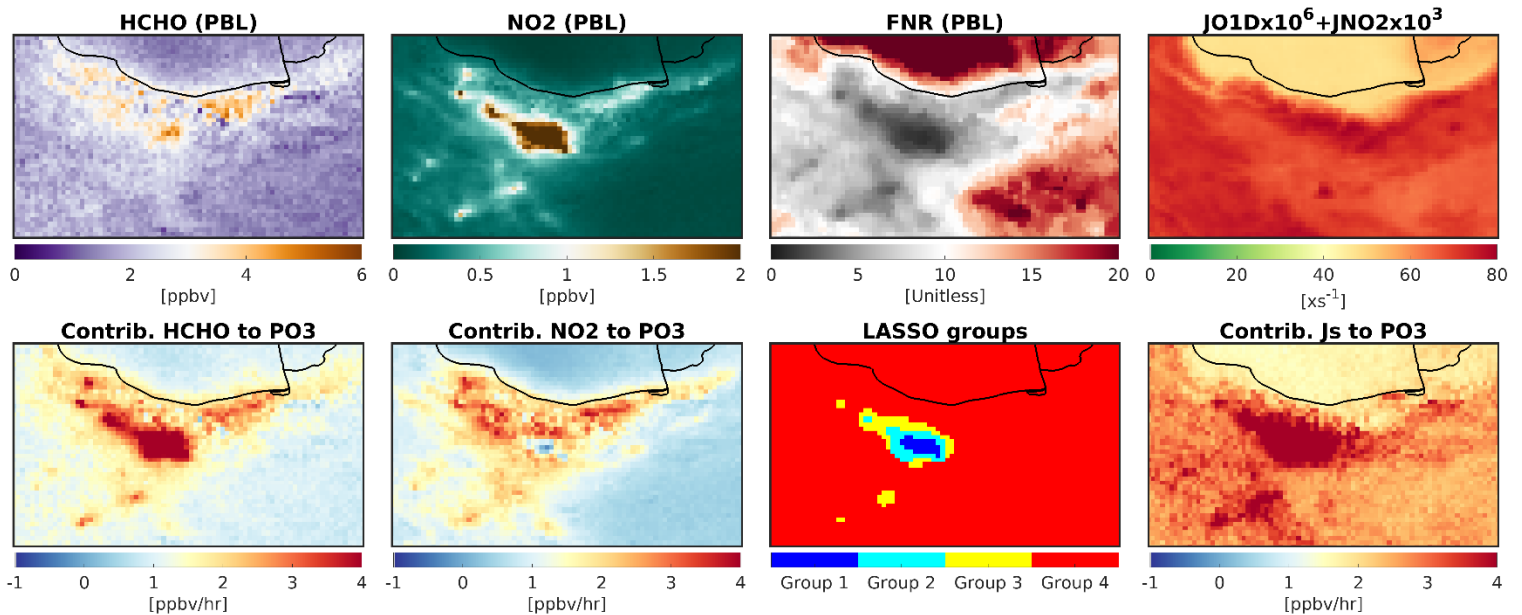

**Figure S2.** (first row) PBL concentrations of HCHO, NO<sub>2</sub>, FNR and sum of scaled  $jO1D$  and  $jNO2$  derived from TROPOMI and models in July 2019; (second row) the contributions of HCHO, NO<sub>2</sub>, and photolysis rates to PO<sub>3</sub>, along with the defined LASSO ozone production sensitivity regimes for PO<sub>3</sub> estimates. The location is Tehran, Iran.

**Table S1.** Characteristics of selected atmospheric composition aircraft campaigns used in this study.

| Campaign       | When                   | Where                                   | Why                                                                                                                        |
|----------------|------------------------|-----------------------------------------|----------------------------------------------------------------------------------------------------------------------------|
| DISCOVER-AQ-TX | September 2013         | Houston-Galveston-Brazoria in Texas     | To understand a complex urban photochemical environment with abundant petrochemical facilities and elevated mobile sources |
| DISCOVER-AQ-DC | June–July 2011         | Washington D.C. and Maryland            | To study urban-focused photochemical environment experiencing extreme hot and sunny days                                   |
| DISCOVER-AQ-CO | July–August 2014       | Denver-Boulder-Fort Collins in Colorado | To understand urban air quality in a complex meteorological environment due to topography                                  |
| KORUS-AQ       | May-June 2016          | South Korea                             | To study the effect of local and external sources of ozone in an extremely complex chemical environment                    |
| ATOMs          | August 2016 – May 2018 | Pacific and Atlantic Ocean              | To enhance our understanding of ozone pollution in remote areas                                                            |
| INTEX-B        | March – May 2006       | Gulf of Mexico and Pacific              | To study the effect of background pollution                                                                                |
| SENEX          | May–July 2013          | Southeast U.S.                          | To understand the interplay role of biogenic and anthropogenic emissions in shaping air pollution                          |

**Table S2.** The box model configurations and inputs.

|                                                                              |                                                                                                                                                                                                                                                                                                                                                                                                                                                             |
|------------------------------------------------------------------------------|-------------------------------------------------------------------------------------------------------------------------------------------------------------------------------------------------------------------------------------------------------------------------------------------------------------------------------------------------------------------------------------------------------------------------------------------------------------|
| <b>Temporal resolution of samples</b>                                        | 10 or 30 sec                                                                                                                                                                                                                                                                                                                                                                                                                                                |
| <b>Time steps</b>                                                            | 30 minutes                                                                                                                                                                                                                                                                                                                                                                                                                                                  |
| <b>Number of solar cycles</b>                                                | 5                                                                                                                                                                                                                                                                                                                                                                                                                                                           |
| <b>Dilution constant</b>                                                     | 1/86400 (s <sup>-1</sup> ) (=24-hr lifetime)                                                                                                                                                                                                                                                                                                                                                                                                                |
| <b>Meteorological Inputs</b>                                                 | Observed Pressure, Temperature, and Relative Humidity                                                                                                                                                                                                                                                                                                                                                                                                       |
| <b>Photolysis frequencies initial guess</b>                                  | LUT based on the NCAR TUV model calculations                                                                                                                                                                                                                                                                                                                                                                                                                |
| <b>Photolysis frequencies corrections (campaign#<sup>†</sup>)</b>            | Measured jNO <sub>2</sub> (1-8), jO <sup>1</sup> D (4-8), jHCHO (4-5 and 8), and jH <sub>2</sub> O <sub>2</sub> (4-5 and 8)                                                                                                                                                                                                                                                                                                                                 |
| <b>Compounds (campaign#<sup>†</sup>) used for constraining the box model</b> | CO (1-8), NO <sub>x</sub> (1-8), O <sub>3</sub> (1-8), SO <sub>2</sub> (4, 7), CH <sub>4</sub> (1-8), HNO <sub>3</sub> (1-8), H <sub>2</sub> O <sub>2</sub> (4-5 and 7-8), Isoprene (1-4 and 6-7), Monoterpenes (1-4 and 7), Acetone (1-8), Ethyne (4-8), Ethane (4-8), Ethene (4-8), Methanol (1-8), Propane (4-8), Benzene (2-8), Xylene (1 and 4 and 7), Toluene (1-4 and 7), Glyoxal (4), Glycolaldehyde (4), Acetaldehyde (1-8), Ketone (1-4, 6 and 8) |
| <b>Unconstrained compounds (campaign#<sup>†</sup>) used for validation</b>   | HO <sub>2</sub> (4-5 and 8), OH (4-5 and 8), NO (1-8), NO <sub>2</sub> (1-8), PAN (1-8), HCHO (1-8)                                                                                                                                                                                                                                                                                                                                                         |
| <b>Chemical Mechanism</b>                                                    | CB06                                                                                                                                                                                                                                                                                                                                                                                                                                                        |

<sup>†</sup> (1) DISCOVER-Baltimore-Washington, (2) DISCOVER-Texas-Houston, (3) DISCOVER-Colorado, (4) KORUS-AQ, (5) INTEX-B, (6) SENEX, (7) SEAC4RS, and (8) ATOMs
